# Supplementary material
Source: ML conference proceedings conference paper supplement (https://openaccess.thecvf.com/content/WACV2021/html/Niklaus_Revisiting_Adaptive_Convolutions_WACV_2021_paper.html)
Supplement: Supplementary file 1 [file Niklaus_Revisiting_Adaptive_Convolutions_WACV_2021_supplemental.zip]

Archive with 2 entries (2 files):
- supplementary.mp4
- supplementary.pdf
