# Supplementary material
Source: ML conference proceedings conference paper supplement (https://openaccess.thecvf.com/content/WACV2021/html/Niklaus_Revisiting_Adaptive_Convolutions_WACV_2021_paper.html)
Supplement: Supplementary file 1 [file Niklaus_Revisiting_Adaptive_Convolutions_WACV_2021_supplemental.zip › supplementary.pdf]

# Revisiting Adaptive Convolutions for Video Frame Interpolation

## — Supplementary Material —

Simon Niklaus  
Adobe Research

Long Mai  
Adobe Research

Oliver Wang  
Adobe Research

### 1. Middlebury Benchmark

A screenshot of the interpolation error category from the Middlebury benchmark for optical flow [1] is shown Figure 1, where our SepConv++ currently ranks second among all published methods. Please note that DCM is an unpublished paper that, as per the title, distills a cheating model.

### 2. Structural Similarity

We focus on PSNR in our main paper since SSIM [4] is subject to unexpected and unintuitive results [3]. However, we provide relevant results with SSIM instead of PSNR in Tables 1–3. These results support our claims and are generally aligned with PSNR in terms of relative improvements.

### References

- [1] Simon Baker, Daniel Scharstein, J. P. Lewis, Stefan Roth, Michael J. Black, and Richard Szeliski. A Database and Evaluation Methodology for Optical Flow. *International Journal of Computer Vision*, 92(1):1–31, 2011. 1, 2
- [2] Ziwei Liu, Raymond A. Yeh, Xiaoou Tang, Yiming Liu, and Aseem Agarwala. Video Frame Synthesis Using Deep Voxel Flow. In *IEEE International Conference on Computer Vision*, 2017. 2
- [3] Jim Nilsson and Tomas Akenine-Möller. Understanding SSIM. *arXiv/2006.13846*, 2020. 1
- [4] Zhou Wang, Alan C. Bovik, Hamid R. Sheikh, and Eero P. Simoncelli. Image Quality Assessment: From Error Visibility to Structural Similarity. *IEEE Transactions on Image Processing*, 13(4):600–612, 2004. 1
- [5] Tianfan Xue, Baian Chen, Jiajun Wu, Donglai Wei, and William T. Freeman. Video Enhancement With Task-Oriented Flow. *International Journal of Computer Vision*, 127(8):1106–1125, 2019. 2

| Average interpolation error | avg. rank | Mequon<br>(Hidden texture) |             |             | Schefflera<br>(Hidden texture) |             |             | Urban<br>(Synthetic) |             |             | Teddy<br>(Stereo) |             |             | Backyard<br>(High-speed camera) |             |             | Basketball<br>(High-speed camera) |             |             | Dumprtruck<br>(High-speed camera) |              |              | Evergreen<br>(High-speed camera) |              |             |             |             |             |             |              |              |             |             |             |             |
|-----------------------------|-----------|----------------------------|-------------|-------------|--------------------------------|-------------|-------------|----------------------|-------------|-------------|-------------------|-------------|-------------|---------------------------------|-------------|-------------|-----------------------------------|-------------|-------------|-----------------------------------|--------------|--------------|----------------------------------|--------------|-------------|-------------|-------------|-------------|-------------|--------------|--------------|-------------|-------------|-------------|-------------|
|                             |           | im0                        |             | GT          | im0                            |             | GT          | im1                  | im0         |             | GT                | im1         | im0         |                                 | disc        | im1         | im0                               |             | GT          | im1                               | im0          |              | disc                             | im1          | im0         |             | GT          | im1         |             |              |              |             |             |             |             |
|                             |           | all                        | disc        | untext      | all                            | disc        | untext      | all                  | disc        | untext      | all               | disc        | untext      | all                             | disc        | untext      | all                               | disc        | untext      | all                               | disc         | untext       | all                              | disc         | untext      | all         | disc        | untext      |             |              |              |             |             |             |             |
| SoftSplat [169]             | 3.4       | <u>2.06</u>                | <u>3.06</u> | 1.14        | <u>2.80</u>                    | <u>3.91</u> | <u>1.24</u> | <u>1.99</u>          | <u>2.73</u> | <u>1.21</u> | <u>3.84</u>       | <u>4.64</u> | <u>2.69</u> | <u>8.10</u>                     | <u>10.0</u> | <u>2.96</u> | <u>4.10</u>                       | <u>7.53</u> | <u>1.98</u> | <u>5.49</u>                       | <u>12.14</u> | <u>1.39</u>  | <u>5.40</u>                      | <u>8.33</u>  | <u>1.50</u> | <u>4.20</u> | <u>7.53</u> | <u>1.98</u> | <u>5.49</u> | <u>12.14</u> | <u>1.39</u>  | <u>5.40</u> | <u>8.33</u> | <u>1.50</u> |             |
| DCM [185]                   | 8.5       | <u>2.16</u>                | <u>3.30</u> | 1.16        | <u>2.82</u>                    | <u>3.83</u> | <u>1.27</u> | <u>1.89</u>          | <u>2.58</u> | <u>1.10</u> | <u>4.09</u>       | <u>4.98</u> | <u>2.81</u> | <u>8.59</u>                     | <u>10.7</u> | <u>16</u>   | <u>3.09</u>                       | <u>4.87</u> | <u>9.18</u> | <u>2.00</u>                       | <u>6.17</u>  | <u>13.5</u>  | <u>15</u>                        | <u>6.14</u>  | <u>9.45</u> | <u>1.65</u> | <u>4.14</u> | <u>7.53</u> | <u>1.98</u> | <u>5.49</u>  | <u>12.14</u> | <u>1.39</u> | <u>5.40</u> | <u>8.33</u> | <u>1.50</u> |
| SepConv++ [186]             | 10.7      | <u>2.39</u>                | <u>4.17</u> | <u>2.20</u> | <u>2.98</u>                    | <u>4.21</u> | <u>1.28</u> | <u>3.34</u>          | <u>2.33</u> | <u>2.20</u> | <u>4.49</u>       | <u>5.81</u> | <u>2.87</u> | <u>7.64</u>                     | <u>9.42</u> | <u>2.97</u> | <u>3.77</u>                       | <u>6.80</u> | <u>1.96</u> | <u>5.26</u>                       | <u>11.63</u> | <u>1.36</u>  | <u>5.71</u>                      | <u>8.86</u>  | <u>1.45</u> | <u>4.14</u> | <u>7.53</u> | <u>1.98</u> | <u>5.49</u> | <u>12.14</u> | <u>1.39</u>  | <u>5.40</u> | <u>8.33</u> | <u>1.50</u> |             |
| FGME [158]                  | 10.8      | <u>2.08</u>                | <u>3.34</u> | <u>0.98</u> | <u>3.32</u>                    | <u>4.43</u> | <u>1.63</u> | <u>2.46</u>          | <u>3.28</u> | <u>1.41</u> | <u>4.08</u>       | <u>4.85</u> | <u>3.05</u> | <u>7.36</u>                     | <u>9.06</u> | <u>3.03</u> | <u>4.17</u>                       | <u>7.62</u> | <u>2.06</u> | <u>4.95</u>                       | <u>10.72</u> | <u>1.44</u>  | <u>5.45</u>                      | <u>8.41</u>  | <u>1.57</u> | <u>4.14</u> | <u>7.53</u> | <u>1.98</u> | <u>5.49</u> | <u>12.14</u> | <u>1.39</u>  | <u>5.40</u> | <u>8.33</u> | <u>1.50</u> |             |
| BMBC [172]                  | 11.9      | <u>2.30</u>                | <u>3.40</u> | <u>1.20</u> | <u>3.07</u>                    | <u>4.25</u> | <u>1.41</u> | <u>3.17</u>          | <u>4.19</u> | <u>1.66</u> | <u>4.24</u>       | <u>5.28</u> | <u>2.85</u> | <u>7.79</u>                     | <u>9.62</u> | <u>3.14</u> | <u>4.08</u>                       | <u>7.47</u> | <u>2.02</u> | <u>5.63</u>                       | <u>12.46</u> | <u>1.40</u>  | <u>5.55</u>                      | <u>8.58</u>  | <u>1.61</u> | <u>4.14</u> | <u>7.53</u> | <u>1.98</u> | <u>5.49</u> | <u>12.14</u> | <u>1.39</u>  | <u>5.40</u> | <u>8.33</u> | <u>1.50</u> |             |
| EAFI [171]                  | 12.0      | <u>2.22</u>                | <u>3.69</u> | <u>1.15</u> | <u>3.16</u>                    | <u>4.44</u> | <u>1.50</u> | <u>2.12</u>          | <u>3.26</u> | <u>1.15</u> | <u>4.28</u>       | <u>5.30</u> | <u>2.92</u> | <u>8.71</u>                     | <u>10.8</u> | <u>17</u>   | <u>3.03</u>                       | <u>4.97</u> | <u>9.45</u> | <u>1.99</u>                       | <u>5.94</u>  | <u>12.33</u> | <u>1.38</u>                      | <u>5.84</u>  | <u>9.03</u> | <u>1.55</u> | <u>4.14</u> | <u>7.53</u> | <u>1.98</u> | <u>5.49</u>  | <u>12.14</u> | <u>1.39</u> | <u>5.40</u> | <u>8.33</u> | <u>1.50</u> |
| STAR-Net [164]              | 14.0      | <u>2.18</u>                | <u>3.37</u> | <u>1.21</u> | <u>3.46</u>                    | <u>4.88</u> | <u>1.47</u> | <u>3.04</u>          | <u>4.33</u> | <u>1.58</u> | <u>4.41</u>       | <u>5.44</u> | <u>2.76</u> | <u>7.51</u>                     | <u>9.27</u> | <u>2.98</u> | <u>4.65</u>                       | <u>8.72</u> | <u>1.99</u> | <u>6.21</u>                       | <u>13.44</u> | <u>1.41</u>  | <u>6.17</u>                      | <u>9.45</u>  | <u>1.49</u> | <u>4.14</u> | <u>7.53</u> | <u>1.98</u> | <u>5.49</u> | <u>12.14</u> | <u>1.39</u>  | <u>5.40</u> | <u>8.33</u> | <u>1.50</u> |             |
| EDSC [174]                  | 15.2      | <u>2.32</u>                | <u>3.90</u> | <u>1.16</u> | <u>3.10</u>                    | <u>4.38</u> | <u>1.51</u> | <u>2.98</u>          | <u>4.34</u> | <u>1.36</u> | <u>4.49</u>       | <u>5.74</u> | <u>3.16</u> | <u>8.05</u>                     | <u>9.96</u> | <u>3.08</u> | <u>4.89</u>                       | <u>9.28</u> | <u>2.02</u> | <u>5.55</u>                       | <u>12.35</u> | <u>1.41</u>  | <u>6.42</u>                      | <u>9.99</u>  | <u>1.55</u> | <u>4.14</u> | <u>7.53</u> | <u>1.98</u> | <u>5.49</u> | <u>12.14</u> | <u>1.39</u>  | <u>5.40</u> | <u>8.33</u> | <u>1.50</u> |             |
| AdaCoF [165]                | 19.7      | <u>2.41</u>                | <u>4.10</u> | <u>1.26</u> | <u>3.10</u>                    | <u>4.32</u> | <u>1.43</u> | <u>3.48</u>          | <u>4.31</u> | <u>1.78</u> | <u>4.84</u>       | <u>5.94</u> | <u>2.93</u> | <u>8.68</u>                     | <u>10.8</u> | <u>17</u>   | <u>3.14</u>                       | <u>4.13</u> | <u>7.59</u> | <u>1.97</u>                       | <u>5.77</u>  | <u>12.91</u> | <u>1.37</u>                      | <u>5.60</u>  | <u>8.67</u> | <u>1.48</u> | <u>4.14</u> | <u>7.53</u> | <u>1.98</u> | <u>5.49</u>  | <u>12.14</u> | <u>1.39</u> | <u>5.40</u> | <u>8.33</u> | <u>1.50</u> |
| DSepConv [162]              | 23.3      | <u>2.47</u>                | <u>4.39</u> | <u>1.21</u> | <u>3.32</u>                    | <u>4.60</u> | <u>1.72</u> | <u>3.28</u>          | <u>4.36</u> | <u>1.50</u> | <u>5.11</u>       | <u>6.36</u> | <u>3.23</u> | <u>7.85</u>                     | <u>9.69</u> | <u>3.11</u> | <u>4.68</u>                       | <u>11</u>   | <u>8.78</u> | <u>11</u>                         | <u>2.04</u>  | <u>5.65</u>  | <u>7</u>                         | <u>12.57</u> | <u>1.44</u> | <u>6.54</u> | <u>21</u>   | <u>10.2</u> | <u>21</u>   | <u>1.58</u>  | <u>16</u>    | <u>1.58</u> | <u>16</u>   |             |             |

Figure 1: Screenshot of our IE-ranking in the Middlebury benchmark (taken on the 25th of September, currently private).

|                       | training dataset | Middlebury<br>Baker <i>et al.</i> [1] |             | Vimeo-90k<br>Xue <i>et al.</i> [5] |             | UCF101 - DVF<br>Liu <i>et al.</i> [2] |             | Xiph - 1K<br>(4K resized to 1K) |             | Xiph - 2K<br>(4K resized to 2K) |             |
|-----------------------|------------------|---------------------------------------|-------------|------------------------------------|-------------|---------------------------------------|-------------|---------------------------------|-------------|---------------------------------|-------------|
|                       |                  | SSIM                                  | relative    | SSIM                               | relative    | SSIM                                  | relative    | SSIM                            | relative    | SSIM                            | relative    |
|                       |                  | ↑                                     | improvement | ↑                                  | improvement | ↑                                     | improvement | ↑                               | improvement | ↑                               | improvement |
| original SepConv      | proprietary      | 0.959                                 | —           | 0.956                              | —           | 0.947                                 | —           | 0.959                           | —           | 0.929                           | —           |
| reimplementation      | Vimeo-90k        | 0.958                                 | —           | 0.953                              | —           | 0.949                                 | —           | 0.959                           | —           | 0.925                           | —           |
| + delayed padding     | — ” —            | 0.959                                 | + 0.001     | 0.956                              | + 0.003     | 0.950                                 | + 0.001     | 0.960                           | + 0.001     | 0.926                           | + 0.001     |
| + input normalization | — ” —            | 0.962                                 | + 0.003     | 0.957                              | + 0.001     | 0.950                                 | + 0.000     | 0.955                           | + 0.005     | 0.925                           | + 0.001     |
| + improved network    | — ” —            | 0.963                                 | + 0.001     | 0.957                              | + 0.000     | 0.950                                 | + 0.000     | 0.962                           | + 0.007     | 0.930                           | + 0.005     |
| + normalized kernels  | — ” —            | 0.967                                 | + 0.004     | 0.960                              | + 0.003     | 0.950                                 | + 0.000     | 0.963                           | + 0.001     | 0.932                           | + 0.002     |
| + contextual training | — ” —            | 0.968                                 | + 0.001     | 0.961                              | + 0.001     | 0.950                                 | + 0.000     | <u>0.964</u>                    | + 0.001     | 0.933                           | + 0.001     |
| + self-ensembling     | — ” —            | <u>0.969</u>                          | + 0.001     | <u>0.962</u>                       | + 0.001     | <u>0.951</u>                          | + 0.001     | <u>0.964</u>                    | + 0.000     | <u>0.934</u>                    | + 0.001     |

Table 1: Ablation experiments to quantitatively analyze the effects of our proposed techniques. In short, they each positively affect the interpolation quality across different dataset as long as the inter-frame motion does not exceed the kernel size.

|                                         | training dataset | Middlebury<br>Baker <i>et al.</i> [1] |             | Vimeo-90k<br>Xue <i>et al.</i> [5] |             | UCF101 - DVF<br>Liu <i>et al.</i> [2] |             | Xiph - 1K<br>(4K resized to 1K) |             | Xiph - 2K<br>(4K resized to 2K) |             |
|-----------------------------------------|------------------|---------------------------------------|-------------|------------------------------------|-------------|---------------------------------------|-------------|---------------------------------|-------------|---------------------------------|-------------|
|                                         |                  | SSIM                                  | relative    | SSIM                               | relative    | SSIM                                  | relative    | SSIM                            | relative    | SSIM                            | relative    |
|                                         |                  | ↑                                     | improvement | ↑                                  | improvement | ↑                                     | improvement | ↑                               | improvement | ↑                               | improvement |
| SepConv - $\mathcal{L}_1$               | proprietary      | 0.959                                 | —           | 0.956                              | —           | 0.947                                 | —           | 0.959                           | —           | 0.929                           | —           |
| Ours - $\mathcal{L}_{C_{Tx}}$           | Vimeo-90k        | 0.968                                 | + 0.009     | 0.961                              | + 0.005     | 0.950                                 | + 0.003     | <u>0.964</u>                    | + 0.005     | 0.933                           | + 0.004     |
| Ours - $\mathcal{L}_{C_{Tx}} - 8\times$ | — ” —            | <u>0.969</u>                          | + 0.001     | <u>0.962</u>                       | + 0.001     | <u>0.951</u>                          | + 0.001     | <u>0.964</u>                    | + 0.000     | <u>0.934</u>                    | + 0.001     |

Table 2: Quantitative comparison with SepConv. We list two separate results of our proposed approach, one without and one with self-ensembling. The self-ensembling is denoted by  $8\times$  as it represents a combination of eight independent estimates.

|                                         | venue      | Middlebury<br>Baker <i>et al.</i> [1] |                        | Vimeo-90k<br>Xue <i>et al.</i> [5] |                       | UCF101 - DVF<br>Liu <i>et al.</i> [2] |                        | Xiph - 1K<br>(4K resized to 1K) |                        | Xiph - 2K<br>(4K resized to 2K) |                       |
|-----------------------------------------|------------|---------------------------------------|------------------------|------------------------------------|-----------------------|---------------------------------------|------------------------|---------------------------------|------------------------|---------------------------------|-----------------------|
|                                         |            | SSIM                                  | absolute               | SSIM                               | absolute              | SSIM                                  | absolute               | SSIM                            | absolute               | SSIM                            | absolute              |
|                                         |            | ↑                                     | rank                   | ↑                                  | rank                  | ↑                                     | rank                   | ↑                               | rank                   | ↑                               | rank                  |
| SepConv - $\mathcal{L}_1$               | ICCV 2017  | 0.959                                 | 8 <sup>th</sup> of 10  | 0.956                              | 9 <sup>th</sup> of 10 | 0.947                                 | 10 <sup>th</sup> of 10 | 0.959                           | 10 <sup>th</sup> of 10 | 0.929                           | 7 <sup>th</sup> of 10 |
| CtxSyn - $\mathcal{L}_{Lap}$            | CVPR 2018  | 0.964                                 | 7 <sup>th</sup> of 10  | 0.961                              | 5 <sup>th</sup> of 10 | 0.949                                 | 9 <sup>th</sup> of 10  | 0.963                           | 5 <sup>th</sup> of 10  | 0.936                           | 3 <sup>rd</sup> of 10 |
| DAIN                                    | CVPR 2019  | 0.965                                 | 5 <sup>th</sup> of 10  | <u>0.964</u>                       | 2 <sup>nd</sup> of 10 | 0.950                                 | 3 <sup>rd</sup> of 10  | <u>0.965</u>                    | 2 <sup>nd</sup> of 10  | <u>0.939</u>                    | 2 <sup>nd</sup> of 10 |
| CAIN                                    | AAAI 2020  | 0.951                                 | 10 <sup>th</sup> of 10 | 0.959                              | 8 <sup>th</sup> of 10 | 0.950                                 | 3 <sup>rd</sup> of 10  | 0.961                           | 8 <sup>th</sup> of 10  | 0.936                           | 3 <sup>rd</sup> of 10 |
| EDSC - $\mathcal{L}_C$                  | arXiv 2020 | 0.967                                 | 4 <sup>th</sup> of 10  | 0.961                              | 5 <sup>th</sup> of 10 | 0.950                                 | 3 <sup>rd</sup> of 10  | 0.963                           | 5 <sup>th</sup> of 10  | OOM                             | OOM                   |
| AdaCoF                                  | CVPR 2020  | 0.959                                 | 8 <sup>th</sup> of 10  | 0.956                              | 9 <sup>th</sup> of 10 | 0.950                                 | 3 <sup>rd</sup> of 10  | 0.960                           | 9 <sup>th</sup> of 10  | 0.927                           | 8 <sup>th</sup> of 10 |
| SoftSplat - $\mathcal{L}_{Lap}$         | CVPR 2020  | <u>0.971</u>                          | 1 <sup>st</sup> of 10  | <u>0.970</u>                       | 1 <sup>st</sup> of 10 | <u>0.952</u>                          | 1 <sup>st</sup> of 10  | <u>0.969</u>                    | 1 <sup>st</sup> of 10  | <u>0.944</u>                    | 1 <sup>st</sup> of 10 |
| BMBC                                    | ECCV 2020  | 0.965                                 | 5 <sup>th</sup> of 10  | <u>0.964</u>                       | 2 <sup>nd</sup> of 10 | 0.950                                 | 3 <sup>rd</sup> of 10  | 0.963                           | 5 <sup>th</sup> of 10  | OOM                             | OOM                   |
| Ours - $\mathcal{L}_{C_{Tx}}$           | N/A        | 0.968                                 | 3 <sup>rd</sup> of 10  | 0.961                              | 5 <sup>th</sup> of 10 | 0.950                                 | 3 <sup>rd</sup> of 10  | 0.964                           | 3 <sup>rd</sup> of 10  | 0.933                           | 6 <sup>th</sup> of 10 |
| Ours - $\mathcal{L}_{C_{Tx}} - 8\times$ | — ” —      | <u>0.969</u>                          | 2 <sup>nd</sup> of 10  | 0.962                              | 4 <sup>th</sup> of 10 | <u>0.951</u>                          | 2 <sup>nd</sup> of 10  | 0.964                           | 3 <sup>rd</sup> of 10  | 0.934                           | 5 <sup>th</sup> of 10 |

Table 3: Quantitative comparison with recent approaches for video frame interpolation. In addition to highlighting the best result by underlining it, we emphasize the second-best result via a dotted underline. Note that some methods were unable to run on 2K footage due to exceeding the 16 gigabytes of memory available on our graphics card (denoted as “OOM”).
